# Supplementary material for: Protective Effect of Uridine on Structural and Functional Rearrangements in Heart Mitochondria after a High-Dose Isoprenaline Exposure Modelling Stress-Induced Cardiomyopathy in Rats
Source: MDPI journal article supplement (doi:10.3390/ijms242417300), 2023-12-09
Supplement: s1 [file s1]

## Supplementary materials

to the manuscript of “Protective Effect of Uridine on Structural and Functional Rearrangements in Heart Mitochondria after a High-Dose Isoprenaline Exposure Modelling Stress-Induced Cardiomyopathy in Rats”

**Table S1.** Indices of the succinate-fueled respiration and oxidative phosphorylation of rat heart mitochondria in four experimental groups

| Group | V respiration, nmol O <sub>2</sub> * min <sup>-1</sup> * mg <sup>-1</sup> protein |           |           |                         | RCR       | ADP/O     | T <sub>ph</sub> , s |
|-------|-----------------------------------------------------------------------------------|-----------|-----------|-------------------------|-----------|-----------|---------------------|
|       | State 2                                                                           | State 3   | State 4   | State 3U <sub>DNP</sub> |           |           |                     |
| CTR   | 28.4±4.9                                                                          | 136.3±7.8 | 43.5±4.2  | 137.0±10.8              | 3.13±0.18 | 1.99±0.09 | 22.8±3.7            |
| CTR+U | 24.9±1.7                                                                          | 112.9±7.2 | 37.0±1.3  | 114.5±13.3              | 3.06±0.19 | 1.98±0.07 | 26.6±3.9            |
| ISO   | 20.9±3.6                                                                          | 84.2±6.4* | 28.4±2.3* | 85.4±6.2*               | 2.91±0.11 | 1.87±0.08 | 39.4±2.9*           |
| ISO+U | 21.6±3.9                                                                          | 87.7±7.5* | 27.2±1.7* | 93.3±5.6*               | 3.12±0.13 | 1.92±0.09 | 33.3±3.1            |

Medium composition: 130 mM KCl, 5 mM NaH<sub>2</sub>PO<sub>4</sub>, 10 μM EGTA, and 10 mM HEPES-KOH, pH 7.4. Respiration of mitochondria was fueled by 5.0 mM potassium succinate (in the presence of 1 μM rotenone). Mitochondrial respiration in State 3 was initiated by 200 μM ADP. Mitochondrial respiration in state 3U<sub>DNP</sub> was initiated by 50 μM 2,4-dinitrophenol. The results are presented as means ± SEM (*n* = 8-10). \**p* < 0.05 compared to the control group (CTR); \**p* < 0.05 compared to the ISO group.

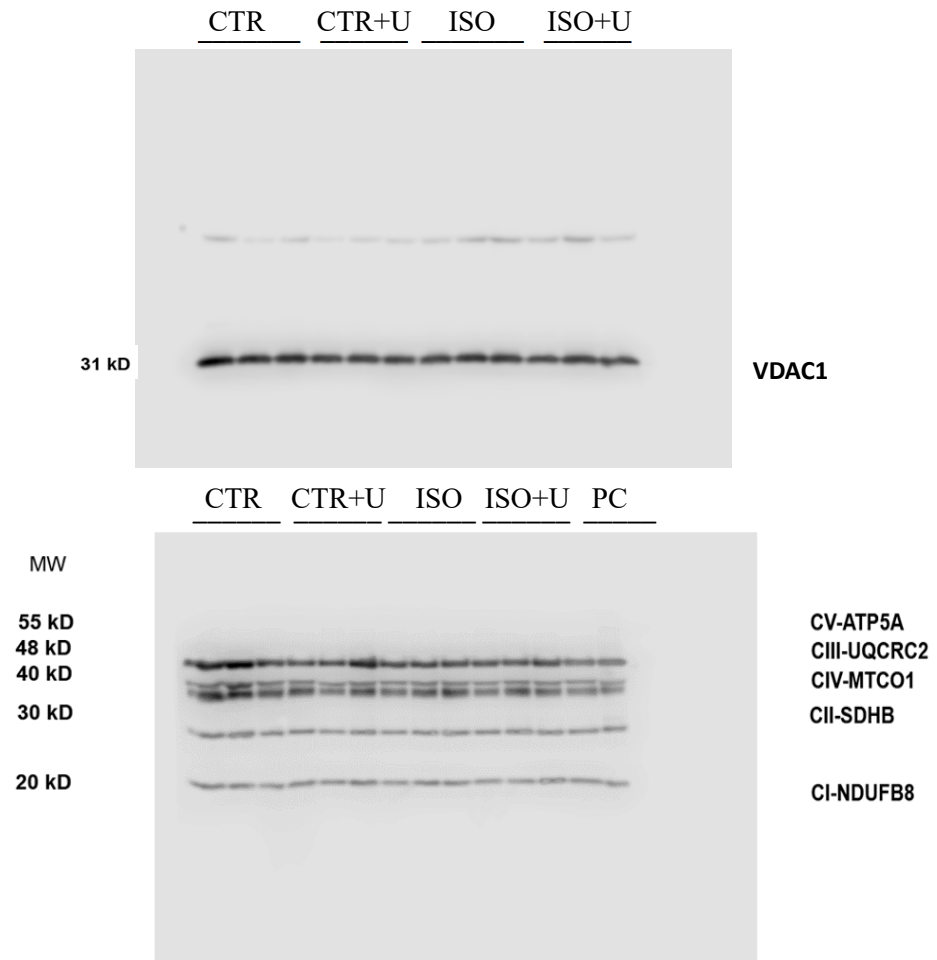

**Figure S1.** Representative Western blot of typical subunits of complexes I-V of the respiratory chain (CI-NDUFB8, CII-SDHB, CIII-UQCRC2, CIV-MTCO1 and CV-ATP5A) in the mitochondria isolated from the heart of experimental rats. Rat heart mitochondria were applied in an amount of 10  $\mu$ g of protein per band. The analysis was carried out using the Total OXPHOS Rodent WB Antibody Cocktail (Abcam, #ab110413) and the polyclonal anti-VDAC1 antibodies (Abcam, #ab15895). Analysis of the content of the OXPHOS subunits in the heart mitochondria of rats from four experimental groups (three independent experiments). PC - positive control (Abcam, #ab110341) (10  $\mu$ g of protein in each of the last two bands).
